# Supplementary material for: Caenorhabditis elegans Histone Deacetylase hda-1 Is Required for Morphogenesis of the Vulva and LIN-12/Notch-Mediated Specification of Uterine Cell Fates
Source: PubMed Central journal article supplement (PMC3737176; doi:10.1534/g3.113.006999), 2013-08-01
Supplement: supp_g3.113.006999_FigureS1.pdf [file supp_g3.113.006999_FigureS1.pdf]

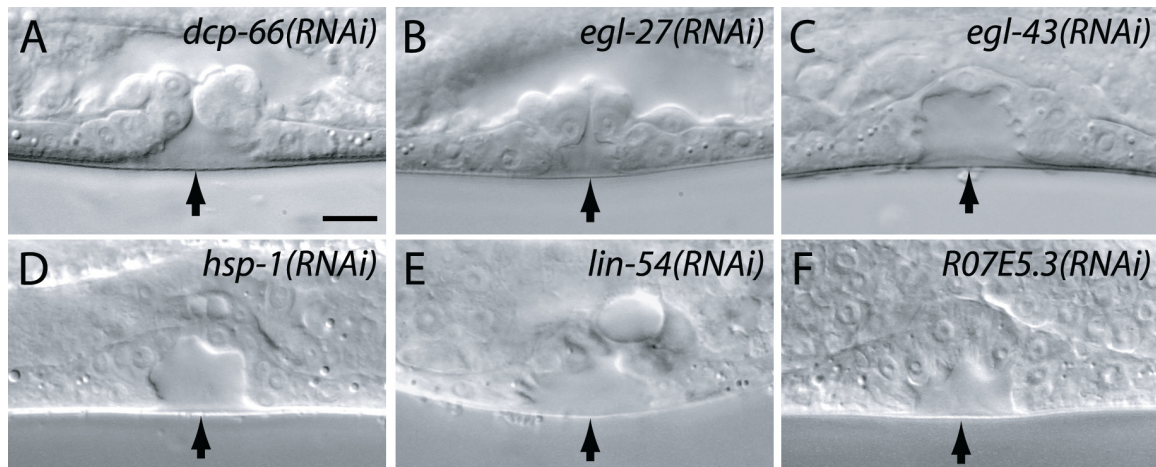

**Figure S1** A subset of genes for which RNAi-mediated knockdown caused defects in vulval morphology. The phenotypes were examined in L4 stage animals. Arrows mark the center of vulval invagination. Scale bar is 10 μm.
